# Supplementary material
Source: publisher site journal article supplement (https://www.spandidos-publications.com/1785/downloadSupplementary)
Supplement: Supplementary file 1 [file downloadSupplementary]

## Sheet: Different_Gene
Table SI. DEGs between MCF-7 cells overexpressing miR-28-5p and the control.
Entrez	Gene Symbol	Gene Title	miR-28-5p	control	Fold Change	logFC	absolute FC	Regulation
10144	FAM13A	family with sequence similarity 13 member A	6.61477	7.37056	-1.68856	-0.75579	1.68856	down
25890	ABI3BP	ABI family member 3 binding protein	5.74181	6.80144	-2.0844	-1.05963	2.0844	down
9315	NREP	neuronal regeneration related protein	6.90567	7.88387	-1.97001	-0.9782	1.97001	down
142940	TRUB1	TruB pseudouridine (psi) synthase family member 1	5.64793	6.28214	-1.55209	-0.63421	1.55209	down
29902	FAM216A	family with sequence similarity 216 member A	9.84874	9.13391	1.64129	0.71483	1.64129	up
1200	TPP1	tripeptidyl peptidase I	10.3081	10.9117	-1.51948	-0.60358	1.51948	down
157378	TMEM65	transmembrane protein 65	9.64734	8.91612	1.66004	0.73122	1.66004	up
8876	VNN1	vanin 1	4.05408	4.73831	-1.60684	-0.68423	1.60684	down
51762	RAB8B	RAB8B, member RAS oncogene family	9.78579	10.8366	-2.07171	-1.05082	2.07171	down
23002	DAAM1	dishevelled associated activator of morphogenesis 1	9.41728	10.1198	-1.62734	-0.70252	1.62734	down
5228	PGF	placental growth factor	7.90055	8.84362	-1.92262	-0.94307	1.92262	down
10732	TCFL5	transcription factor-like 5 (basic helix-loop-helix)	9.97116	9.3195	1.57097	0.65166	1.57097	up
27230	SERP1	stress-associated endoplasmic reticulum protein 1	9.96762	8.92201	2.06424	1.04561	2.06424	up
23348	DOCK9	dedicator of cytokinesis 9	8.42472	9.10662	-1.60425	-0.6819	1.60425	down
9122	SLC16A4	solute carrier family 16 member 4	4.64604	5.47236	-1.77316	-0.82632	1.77316	down
2475	MTOR	mechanistic target of rapamycin (serine/threonine kinase)	9.60389	8.94079	1.58348	0.6631	1.58348	up
10605	PAIP1	poly(A) binding protein interacting protein 1	9.59881	8.55799	2.0574	1.04082	2.0574	up
51776	ZAK	sterile alpha motif and leucine zipper containing kinase AZK	7.13558	6.35706	1.71537	0.77852	1.71537	up
3306	HSPA2	heat shock protein family A (Hsp70) member 2	5.31479	4.30173	2.01819	1.01306	2.01819	up
54664	TMEM106B	transmembrane protein 106B	6.45977	7.14755	-1.6108	-0.68778	1.6108	down
5199	CFP	complement factor properdin	8.13389	9.03427	-1.86656	-0.90038	1.86656	down
5051	PAFAH2	platelet-activating factor acetylhydrolase 2	5.59166	6.41289	-1.76691	-0.82123	1.76691	down
9191	DEDD	death effector domain containing	5.34986	5.9844	-1.55244	-0.63454	1.55244	down
29127	RACGAP1	Rac GTPase activating protein 1	9.68248	8.92691	1.6883	0.75557	1.6883	up
3833	KIFC1	kinesin family member C1	10.4273	9.67463	1.68485	0.75262	1.68485	up
5908	RAP1B	RAP1B, member of RAS oncogene family	8.34198	9.13086	-1.72773	-0.78888	1.72773	down
10397	NDRG1	N-myc downstream regulated 1	7.73847	9.25015	-2.85142	-1.51168	2.85142	down
92241	RCSD1	RCSD domain containing 1	6.52089	5.91483	1.5221	0.60606	1.5221	up
2967	GTF2H3	general transcription factor IIH subunit 3	8.12411	7.18776	1.91368	0.93635	1.91368	up
9729	KIAA0408	KIAA0408	6.13353	5.40159	1.66087	0.73194	1.66087	up
9986	RCE1	Ras converting CAAX endopeptidase 1	9.48449	10.078	-1.50887	-0.59347	1.50887	down
29994	BAZ2B	bromodomain adjacent to zinc finger domain 2B	5.52669	6.28439	-1.69079	-0.7577	1.69079	down
347902	AMIGO2	adhesion molecule with Ig-like domain 2	7.79765	8.93056	-2.19301	-1.13291	2.19301	down
158135	TTLL11	tubulin tyrosine ligase like11	7.05489	6.31033	1.67546	0.74456	1.67546	up
6000	RGS7	regulator of G-protein signaling 7	7.02313	6.37246	1.5699	0.65067	1.5699	up
57542	KLHL42	kelch like family member 42	8.2643	7.66436	1.51565	0.59994	1.51565	up
79071	ELOVL6	ELOVL fatty acid elongase 6	9.29658	8.04541	2.38034	1.25117	2.38034	up
834	CASP1	caspase 1	6.39404	7.2327	-1.78839	-0.83866	1.78839	down
100528062	ARMCX5-GPRASP2	ARMCX5-GPRASP2 readthrough	8.31136	7.71032	1.51681	0.60104	1.51681	up
4603	MYBL1	v-myb avian myeloblastosis viral oncogene homolog-like 1	10.7646	9.50371	2.39637	1.26085	2.39637	up
100534611	TM4SF19-TCTEX1D2	TM4SF19-TCTEX1D2 readthrough (NMD candidate)	7.57003	8.31972	-1.68143	-0.74969	1.68143	down
399512	SLC25A35	solute carrier family 25, member 35	7.14762	6.52664	1.53792	0.62098	1.53792	up
55041	PLEKHB2	pleckstrin homology domain containing B2	11.2971	10.4583	1.78855	0.83879	1.78855	up
57405	SPC25	SPC25, NDC80 kinetochore complex component	9.39587	8.72417	1.59295	0.6717	1.59295	up
5899	RALB	v-ral simian leukemia viral oncogene homolog B	9.96392	9.30653	1.57723	0.65739	1.57723	up
1437	CSF2	colony stimulating factor 2 (granulocyte-macrophage)	7.17303	7.83307	-1.58013	-0.66004	1.58013	down
9055	PRC1	protein regulator of cytokinesis 1	5.83845	5.15481	1.60619	0.68364	1.60619	up
4735	SEPT2	septin 2	9.75082	8.98235	1.70346	0.76847	1.70346	up
81610	FAM83D	family with sequence similarity 83 member D	11.0925	10.3611	1.6603	0.73144	1.6603	up
51123	ZNF706	zinc finger protein 706	9.03799	9.76322	-1.65316	-0.72523	1.65316	down
2312	FLG	filaggrin	7.10584	7.84047	-1.66397	-0.73463	1.66397	down
79733	E2F8	E2F transcription factor 8	8.6769	8.0877	1.50441	0.5892	1.50441	up
1435	CSF1	colony stimulating factor 1 (macrophage)	7.05917	7.97487	-1.88648	-0.9157	1.88648	down
222658	KCTD20	potassium channel tetramerization domain containing 20	8.35749	7.51036	1.79892	0.84713	1.79892	up
728747	ANKRD20A4	ankyrin repeat domain 20 family member A4	5.13222	4.43386	1.62266	0.69836	1.62266	up
7422	VEGFA	vascular endothelial growth factor A	8.17693	9.2306	-2.0758	-1.05367	2.0758	down
114569	MAL2	mal, T-cell differentiation protein 2 (gene/pseudogene)	9.06916	9.94059	-1.82948	-0.87143	1.82948	down
26256	CABYR	calcium binding tyrosine-(Y)-phosphorylation regulated	7.24773	6.63753	1.52647	0.6102	1.52647	up
6095	RORA	RAR-related orphan receptor A	6.27064	7.56	-2.4442	-1.28936	2.4442	down
9827	RGP1	RGP1 homolog, RAB6A GEF complex partner 1	10.302	9.6798	1.53926	0.62224	1.53926	up
1956	EGFR	epidermal growth factor receptor	7.29669	7.93931	-1.56116	-0.64262	1.56116	down
5985	RFC5	replication factor C subunit 5	9.31	8.6181	1.61541	0.6919	1.61541	up
643911	CRNDE	colorectal neoplasia differentially expressed (non-protein coding)	10.0495	9.42565	1.54093	0.6238	1.54093	up
80381	CD276	CD276 molecule	8.41655	9.02756	-1.52733	-0.61101	1.52733	down
91782	CHMP7	charged multivesicular body protein 7	10.0046	9.25305	1.68358	0.75153	1.68358	up
1032	CDKN2D	cyclin-dependent kinase inhibitor 2D (p19, inhibits CDK4)	10.4343	9.71893	1.64194	0.7154	1.64194	up
253827	MSRB3	methionine sulfoxide reductase B3	7.73272	6.87905	1.80709	0.85367	1.80709	up
112399	EGLN3	egl-9 family hypoxia-inducible factor 3	5.23722	6.05414	-1.76164	-0.81692	1.76164	down
374986	FAM73A	family with sequence similarity 73 member A	7.55364	8.13985	-1.5013	-0.58621	1.5013	down
1739	DLG1	discs, large homolog 1 (Drosophila)	10.7647	10.1794	1.50033	0.58528	1.50033	up
950	SCARB2	scavenger receptor class B, member 2	7.05712	7.71456	-1.57728	-0.65744	1.57728	down
5230	PGK1	phosphoglycerate kinase 1	11.0412	11.7029	-1.58198	-0.66173	1.58198	down
115294	PCMTD1	protein-L-isoaspartate (D-aspartate) O-methyltransferase domain containing 1	7.9008	8.53544	-1.55255	-0.63464	1.55255	down
1645	AKR1C1	aldo-keto reductase family 1, member C1	9.532	10.1613	-1.54684	-0.62932	1.54684	down
8970	HIST1H2BJ	histone cluster 1, H2bj	7.32143	6.62729	1.61792	0.69414	1.61792	up
307	ANXA4	annexin A4	9.03191	9.82249	-1.72977	-0.79058	1.72977	down
84100	ARL6	ADP ribosylation factor like GTPase 6	6.21087	5.46527	1.67667	0.7456	1.67667	up
27125	AFF4	AF4/FMR2 family member 4	7.87072	7.06291	1.75055	0.80781	1.75055	up
55122	AKIRIN2	akirin 2	9.65892	9.05507	1.51977	0.60385	1.51977	up
80724	ACAD10	acyl-CoA dehydrogenase family member 10	5.85985	6.53605	-1.59793	-0.6762	1.59793	down
1965	EIF2S1	eukaryotic translation initiation factor 2 subunit alpha	8.39155	7.66939	1.64965	0.72216	1.64965	up
50636	ANO7	anoctamin 7	6.03919	6.77941	-1.67043	-0.74022	1.67043	down
768	CA9	carbonic anhydrase IX	5.9993	6.7304	-1.6599	-0.7311	1.6599	down
8518	IKBKAP	inhibitor of kappa light polypeptide gene enhancer in B-cells, kinase complex-associated protein	6.0899	6.78472	-1.61868	-0.69482	1.61868	down
375387	NRROS	negative regulator of reactive oxygen species	7.71909	8.51848	-1.74037	-0.79939	1.74037	down
1355	COX15	cytochrome c oxidase assembly homolog 15 (yeast)	7.31438	7.91244	-1.51368	-0.59806	1.51368	down
10112	KIF20A	kinesin family member 20A	11.0918	10.3927	1.62355	0.69915	1.62355	up
11176	BAZ2A	bromodomain adjacent to zinc finger domain 2A	9.07236	9.69069	-1.5351	-0.61833	1.5351	down
64756	ATPAF1	ATP synthase mitochondrial F1 complex assembly factor 1	6.45303	7.63966	-2.2762	-1.18663	2.2762	down
5734	PTGER4	prostaglandin E receptor 4	9.31261	8.7071	1.52152	0.60551	1.52152	up
5569	PKIA	protein kinase (cAMP-dependent, catalytic) inhibitor alpha	5.83168	6.65871	-1.77403	-0.82703	1.77403	down
285753	CEP57L1	centrosomal protein 57kDa-like 1	6.91287	6.31044	1.51827	0.60243	1.51827	up
101	ADAM8	ADAM metallopeptidase domain 8	7.78204	8.52582	-1.67456	-0.74378	1.67456	down
388650	FAM69A	family with sequence similarity 69 member A	6.49502	7.08367	-1.50384	-0.58865	1.50384	down
80110	ZNF614	zinc finger protein 614	7.61348	8.21827	-1.52076	-0.60479	1.52076	down
1470	CST2	cystatin SA	10.1749	10.8313	-1.57611	-0.65637	1.57611	down
55818	KDM3A	lysine (K)-specific demethylase 3A	9.41638	10.1673	-1.68288	-0.75093	1.68288	down
257019	FRMD3	FERM domain containing 3	7.27339	6.63236	1.55944	0.64103	1.55944	up
105376575	LOC105376575	uncharacterized LOC105376575	7.80223	7.05209	1.68196	0.75014	1.68196	up
51099	ABHD5	abhydrolase domain containing 5	6.70634	7.80399	-2.14006	-1.09765	2.14006	down
29880	ALG5	ALG5, dolichyl-phosphate beta-glucosyltransferase	10.4018	8.98416	2.67141	1.4176	2.67141	up
79979	TRMT2B	tRNA methyltransferase 2 homolog B	7.09626	7.74662	-1.56956	-0.65036	1.56956	down
79469	DLEU2L	deleted in lymphocytic leukemia 2-like	9.26408	8.50234	1.69553	0.76174	1.69553	up
7728	ZNF175	zinc finger protein 175	8.2869	8.89838	-1.52783	-0.61148	1.52783	down
79633	FAT4	FAT atypical cadherin 4	4.18635	4.98791	-1.74298	-0.80156	1.74298	down
23086	EXPH5	exophilin 5	6.09175	5.46764	1.54126	0.62411	1.54126	up
5801	PTPRR	protein tyrosine phosphatase, receptor type, R	6.5141	7.79418	-2.42852	-1.28008	2.42852	down
102724823	LOC102724823	inactive gamma-glutamyltranspeptidase 2	7.79392	8.58671	-1.73242	-0.79279	1.73242	down
152002	XXYLT1	xyloside xylosyltransferase 1	8.86157	9.46569	-1.52005	-0.60412	1.52005	down
91947	ARRDC4	arrestin domain containing 4	7.28046	8.00535	-1.65277	-0.72489	1.65277	down
7980	TFPI2	tissue factor pathway inhibitor 2	9.75674	10.5826	-1.77262	-0.82588	1.77262	down
79642	ARSJ	arylsulfatase family member J	8.77382	7.56	2.31951	1.21382	2.31951	up
728226	GGTLC3	gamma-glutamyltransferase light chain 3	7.79392	8.58671	-1.73242	-0.79279	1.73242	down
388403	YPEL2	yippee like 2	6.80088	7.4957	-1.61868	-0.69482	1.61868	down
387104	SOGA3	SOGA family member 3	6.13353	5.40159	1.66087	0.73194	1.66087	up
8847	DLEU2	deleted in lymphocytic leukemia 2 (non-protein coding)	9.26408	8.50234	1.69553	0.76174	1.69553	up
4065	LY75	lymphocyte antigen 75	5.30535	6.35997	-2.07717	-1.05462	2.07717	down
1295	COL8A1	collagen, type VIII, alpha 1	10.008	9.41301	1.51048	0.59501	1.51048	up
153222	CREBRF	CREB3 regulatory factor	7.39192	8.20499	-1.75695	-0.81307	1.75695	down
83440	ADPGK	ADP-dependent glucokinase	10.097	9.4361	1.58106	0.66089	1.58106	up
93129	ORAI3	ORAI calcium release-activated calcium modulator 3	7.94347	8.56544	-1.53898	-0.62197	1.53898	down
3814	KISS1	KiSS-1 metastasis-suppressor	7.55485	6.80212	1.68498	0.75273	1.68498	up
1646	AKR1C2	aldo-keto reductase family 1, member C2	9.532	10.1613	-1.54684	-0.62932	1.54684	down
5326	PLAGL2	pleiomorphic adenoma gene-like 2	5.00597	5.62117	-1.53177	-0.6152	1.53177	down
7045	TGFBI	transforming growth factor beta induced	8.86723	9.45797	-1.50602	-0.59074	1.50602	down
10659	CELF2	CUGBP, Elav-like family member 2	5.76049	6.41289	-1.57178	-0.6524	1.57178	down
1104	RCC1	regulator of chromosome condensation 1	9.12465	7.8119	2.48415	1.31275	2.48415	up
8760	CDS2	CDP-diacylglycerol synthase 2	9.14092	8.53666	1.5202	0.60426	1.5202	up
5163	PDK1	pyruvate dehydrogenase kinase, isozyme 1	8.16845	9.25433	-2.12267	-1.08588	2.12267	down
5901	RAN	RAN, member RAS oncogene family	11.4519	10.7245	1.65564	0.72739	1.65564	up
51108	METTL9	methyltransferase like 9	10.8881	10.2994	1.50389	0.5887	1.50389	up
169200	TMEM64	transmembrane protein 64	6.81001	7.63086	-1.76645	-0.82085	1.76645	down
10658	CELF1	CUGBP, Elav-like family member 1	8.91526	9.51828	-1.51889	-0.60302	1.51889	down
8301	PICALM	phosphatidylinositol binding clathrin assembly protein	9.99697	9.37274	1.54139	0.62423	1.54139	up
286827	TRIM59	tripartite motif containing 59	6.27063	5.31952	1.93336	0.95111	1.93336	up
57478	USP31	ubiquitin specific peptidase 31	7.9155	7.08125	1.78293	0.83425	1.78293	up
140686	WFDC3	WAP four-disulfide core domain 3	7.43749	8.54481	-2.15445	-1.10732	2.15445	down
51073	MRPL4	mitochondrial ribosomal protein L4	4.66481	5.27215	-1.52345	-0.60734	1.52345	down
6676	SPAG4	sperm associated antigen 4	7.22403	8.5921	-2.58125	-1.36807	2.58125	down
10810	WASF3	WAS protein family member 3	8.83781	9.53548	-1.62188	-0.69767	1.62188	down
55691	FRMD4A	FERM domain containing 4A	8.07717	8.69245	-1.53186	-0.61528	1.53186	down
8900	CCNA1	cyclin A1	7.79175	6.43029	2.56945	1.36146	2.56945	up
8515	ITGA10	integrin alpha 10	5.49775	6.68156	-2.27176	-1.18381	2.27176	down
286343	LURAP1L	leucine rich adaptor protein 1-like	6.94235	7.53219	-1.50508	-0.58984	1.50508	down
348093	RBPMS2	RNA binding protein with multiple splicing 2	7.69568	7.07141	1.54143	0.62427	1.54143	up
5597	MAPK6	mitogen-activated protein kinase 6	8.22991	8.96642	-1.66614	-0.73651	1.66614	down
26289	AK5	adenylate kinase 5	5.40598	6.1602	-1.68672	-0.75422	1.68672	down
84522	JAGN1	jagunal homolog 1	9.82444	10.5544	-1.65856	-0.72993	1.65856	down
397	ARHGDIB	Rho GDP dissociation inhibitor (GDI) beta	10.7002	9.17934	2.86962	1.52086	2.86962	up
3696	ITGB8	integrin beta 8	6.09418	7.43052	-2.5251	-1.33634	2.5251	down
55024	BANK1	B-cell scaffold protein with ankyrin repeats 1	6.6596	6.04905	1.52684	0.61055	1.52684	up
10615	SPAG5	sperm associated antigen 5	10.765	10.1166	1.56742	0.64839	1.56742	up
6996	TDG	thymine DNA glycosylase	7.15193	7.76253	-1.52689	-0.6106	1.52689	down
140688	NOL4L	nucleolar protein 4-like	5.29354	6.00452	-1.63692	-0.71098	1.63692	down
9829	DNAJC6	DnaJ heat shock protein family (Hsp40) member C6	6.04938	5.23233	1.7618	0.81705	1.7618	up
51117	COQ4	coenzyme Q4	8.9917	8.34116	1.56976	0.65054	1.56976	up
116211	TM4SF19	transmembrane 4 L six family member 19	7.57003	8.31972	-1.68143	-0.74969	1.68143	down
283422	LINC01559	long intergenic non-protein coding RNA 1559	6.07468	6.68523	-1.52684	-0.61055	1.52684	down
148534	TMEM56	transmembrane protein 56	8.44007	7.55916	1.84154	0.88091	1.84154	up
124976	SPNS2	spinster homolog 2 (Drosophila)	7.87921	8.98403	-2.15072	-1.10482	2.15072	down
6945	MLX	MLX, MAX dimerization protein	10.3239	9.72939	1.51	0.59455	1.51	up
57561	ARRDC3	arrestin domain containing 3	6.72558	7.67801	-1.93513	-0.95243	1.93513	down
11098	PRSS23	protease, serine 23	10.8976	11.6579	-1.69377	-0.76024	1.69377	down
115908	CTHRC1	collagen triple helix repeat containing 1	5.9317	6.98689	-2.07799	-1.05519	2.07799	down
132789	GNPDA2	glucosamine-6-phosphate deaminase 2	6.99379	7.59644	-1.5185	-0.60265	1.5185	down
79745	CLIP4	CAP-Gly domain containing linker protein family member 4	8.40113	9.30957	-1.87701	-0.90844	1.87701	down
23272	FAM208A	family with sequence similarity 208 member A	8.80886	8.07547	1.66254	0.73339	1.66254	up
56999	ADAMTS9	ADAM metallopeptidase with thrombospondin type 1 motif 9	8.71443	9.55875	-1.79542	-0.84432	1.79542	down
4675	NAP1L3	nucleosome assembly protein 1-like 3	6.05195	5.08587	1.95353	0.96608	1.95353	up
7436	VLDLR	very low density lipoprotein receptor	7.46978	8.54613	-2.10869	-1.07635	2.10869	down
6868	ADAM17	ADAM metallopeptidase domain 17	8.65716	9.90495	-2.37477	-1.24779	2.37477	down
604	BCL6	B-cell CLL/lymphoma 6	7.91711	8.60254	-1.60818	-0.68543	1.60818	down
83461	CDCA3	cell division cycle associated 3	10.2478	9.26556	1.97556	0.98226	1.97556	up
201299	RDM1	RAD52 motif containing 1	5.54083	4.92248	1.53512	0.61835	1.53512	up
23071	ERP44	endoplasmic reticulum protein 44	6.91165	7.52204	-1.52667	-0.61039	1.52667	down
10891	PPARGC1A	peroxisome proliferator-activated receptor gamma, coactivator 1 alpha	7.22948	7.99291	-1.69752	-0.76343	1.69752	down
120114	FAT3	FAT atypical cadherin 3	7.17738	6.06142	2.16739	1.11596	2.16739	up
394	ARHGAP5	Rho GTPase activating protein 5	10.0776	10.7333	-1.57537	-0.65569	1.57537	down
28972	SPCS1	signal peptidase complex subunit 1	4.28836	4.87552	-1.50229	-0.58716	1.50229	down
5033	P4HA1	prolyl 4-hydroxylase, alpha polypeptide I	10.0102	10.9385	-1.90293	-0.92822	1.90293	down
1026	CDKN1A	cyclin-dependent kinase inhibitor 1A (p21, Cip1)	8.83634	9.42239	-1.50113	-0.58605	1.50113	down
207	AKT1	v-akt murine thymoma viral oncogene homolog 1	9.50736	8.88951	1.53459	0.61785	1.53459	up
257194	NEGR1	neuronal growth regulator 1	8.21111	7.31587	1.85992	0.89524	1.85992	up
3052	HCCS	holocytochrome c synthase	9.61015	8.82507	1.72319	0.78508	1.72319	up
23568	ARL2BP	ADP ribosylation factor like GTPase 2 binding protein	9.59469	8.41999	2.25746	1.1747	2.25746	up
157807	CLVS1	clavesin 1	7.07843	6.35416	1.65206	0.72427	1.65206	up
8674	VAMP4	vesicle associated membrane protein 4	7.55645	6.88631	1.59123	0.67014	1.59123	up
6690	SPINK1	serine peptidase inhibitor, Kazal type 1	4.81657	5.76643	-1.93169	-0.94986	1.93169	down
205	AK4	adenylate kinase 4	6.69846	7.35146	-1.57243	-0.653	1.57243	down
79365	BHLHE41	basic helix-loop-helix family member e41	8.48715	9.13051	-1.56196	-0.64336	1.56196	down
29126	CD274	CD274 molecule	6.3905	7.14856	-1.69121	-0.75806	1.69121	down
8609	KLF7	Kruppel-like factor 7 (ubiquitous)	5.34001	5.94372	-1.51962	-0.60371	1.51962	down
2308	FOXO1	forkhead box O1	7.97389	8.58802	-1.53063	-0.61413	1.53063	down
894	CCND2	cyclin D2	7.22638	8.08382	-1.81182	-0.85744	1.81182	down
8743	TNFSF10	tumor necrosis factor superfamily member 10	8.25203	8.91746	-1.58604	-0.66543	1.58604	down
4501	MT1X	metallothionein 1X	10.3459	11.1541	-1.75104	-0.80821	1.75104	down
5378	PMS1	PMS1 homolog 1, mismatch repair system component	6.0012	5.37784	1.54046	0.62336	1.54046	up
374654	KIF7	kinesin family member 7	6.80154	6.09118	1.63621	0.71036	1.63621	up
7334	UBE2N	ubiquitin conjugating enzyme E2N	9.56384	10.2637	-1.62429	-0.69981	1.62429	down
221035	REEP3	receptor accessory protein 3	7.98978	8.76737	-1.71426	-0.77759	1.71426	down
201626	PDE12	phosphodiesterase 12	9.92686	9.31082	1.53266	0.61604	1.53266	up
127018	LYPLAL1	lysophospholipase-like 1	7.84517	8.70477	-1.81454	-0.8596	1.81454	down
4751	NEK2	NIMA-related kinase 2	9.44233	8.85707	1.50031	0.58526	1.50031	up
9319	TRIP13	thyroid hormone receptor interactor 13	9.24197	8.64556	1.51195	0.59641	1.51195	up
10628	TXNIP	thioredoxin interacting protein	10.4664	11.3669	-1.86678	-0.90055	1.86678	down
81689	ISCA1	iron-sulfur cluster assembly 1	9.97213	10.6061	-1.55187	-0.63401	1.55187	down
6925	TCF4	transcription factor 4	4.45258	5.04737	-1.51025	-0.59479	1.51025	down
4175	MCM6	minichromosome maintenance complex component 6	9.858	8.81737	2.05713	1.04063	2.05713	up
441430	ANKRD20A2	ankyrin repeat domain 20 family member A2	5.13222	4.43386	1.62266	0.69836	1.62266	up
2887	GRB10	growth factor receptor bound protein 10	9.51315	8.6428	1.82811	0.87035	1.82811	up
3614	IMPDH1	IMP (inosine 5'-monophosphate) dehydrogenase 1	10.1181	10.862	-1.67466	-0.74387	1.67466	down
55909	BIN3	bridging integrator 3	8.46111	7.52246	1.91673	0.93865	1.91673	up
83719	YPEL3	yippee like 3	7.30594	7.94473	-1.55702	-0.63879	1.55702	down
627	BDNF	brain-derived neurotrophic factor	8.26136	7.60222	1.57914	0.65914	1.57914	up
27	ABL2	ABL proto-oncogene 2, non-receptor tyrosine kinase	10.5943	9.94387	1.56959	0.65039	1.56959	up
7128	TNFAIP3	TNF alpha induced protein 3	7.20098	7.84297	-1.56048	-0.64199	1.56048	down
79796	ALG9	ALG9, alpha-1,2-mannosyltransferase	7.53667	8.19479	-1.57802	-0.65812	1.57802	down
8434	RECK	reversion-inducing-cysteine-rich protein with kazal motifs	6.80771	7.50601	-1.62259	-0.6983	1.62259	down
9825	SPATA2	spermatogenesis associated 2	6.30579	7.06103	-1.68791	-0.75524	1.68791	down
126282	TNFAIP8L1	TNF alpha induced protein 8 like 1	6.47907	5.81272	1.58705	0.66635	1.58705	up
124491	TMEM170A	transmembrane protein 170A	8.29302	9.3844	-2.13078	-1.09138	2.13078	down
53836	GPR87	G protein-coupled receptor 87	8.19905	8.94383	-1.67572	-0.74478	1.67572	down
222236	NAPEPLD	N-acyl phosphatidylethanolamine phospholipase D	6.3111	6.98746	-1.5981	-0.67636	1.5981	down
5806	PTX3	pentraxin 3	11.8494	12.5077	-1.57812	-0.65821	1.57812	down
1062	CENPE	centromere protein E	10.3859	9.6253	1.69421	0.76061	1.69421	up
203447	NRK	Nik related kinase	5.96637	5.18675	1.71668	0.77962	1.71668	up
729533	FAM72A	family with sequence similarity 72 member A	9.73131	9.14213	1.50439	0.58918	1.50439	up
64089	SNX16	sorting nexin 16	8.08054	7.28804	1.73207	0.7925	1.73207	up
54495	TMX3	thioredoxin-related transmembrane protein 3	8.93036	7.948	1.97569	0.98236	1.97569	up
3097	HIVEP2	human immunodeficiency virus type I enhancer binding protein 2	8.26212	8.85742	-1.51079	-0.5953	1.51079	down
11064	CNTRL	centriolin	8.01088	7.22062	1.72939	0.79026	1.72939	up
5645	PRSS2	protease, serine 2	6.21989	6.98204	-1.69602	-0.76215	1.69602	down
540	ATP7B	ATPase, Cu++ transporting, beta polypeptide	6.86103	6.09257	1.70345	0.76846	1.70345	up
84986	ARHGAP19	Rho GTPase activating protein 19	8.92245	8.19823	1.65201	0.72422	1.65201	up
643752	RAP1BL	RAP1B, member of RAS oncogene family pseudogene	8.34198	9.13086	-1.72773	-0.78888	1.72773	down
79940	LINC00472	long intergenic non-protein coding RNA 472	8.12376	8.76772	-1.56261	-0.64396	1.56261	down
51124	IER3IP1	immediate early response 3 interacting protein 1	9.95746	9.29782	1.57969	0.65964	1.57969	up
114789	SLC25A25	solute carrier family 25 (mitochondrial carrier; phosphate carrier), member 25	6.92569	6.3327	1.50837	0.59299	1.50837	up
230	ALDOC	aldolase, fructose-bisphosphate C	5.00597	5.83814	-1.78036	-0.83217	1.78036	down
26010	SPATS2L	spermatogenesis associated, serine rich 2 like	7.86097	6.71486	2.21316	1.14611	2.21316	up
2934	GSN	gelsolin	10.6618	11.3955	-1.66294	-0.73374	1.66294	down
3400	ID4	inhibitor of DNA binding 4, dominant negative helix-loop-helix protein	6.76087	6.05421	1.63202	0.70666	1.63202	up
5537	PPP6C	protein phosphatase 6, catalytic subunit	8.24002	8.90095	-1.5811	-0.66093	1.5811	down
79718	TBL1XR1	transducin (beta)-like 1 X-linked receptor 1	10.7201	10.0634	1.57651	0.65673	1.57651	up
100533483	DYX1C1-CCPG1	DYX1C1-CCPG1 readthrough (NMD candidate)	6.49515	7.11589	-1.53766	-0.62074	1.53766	down
1824	DSC2	desmocollin 2	6.27821	6.89228	-1.53057	-0.61407	1.53057	down
57146	TMEM159	transmembrane protein 159	7.64957	8.32872	-1.6012	-0.67915	1.6012	down
94134	ARHGAP12	Rho GTPase activating protein 12	8.34985	9.02874	-1.60091	-0.67889	1.60091	down
2289	FKBP5	FK506 binding protein 5	9.07654	8.40472	1.59308	0.67182	1.59308	up
5644	PRSS1	protease, serine 1	6.21989	6.98204	-1.69602	-0.76215	1.69602	down
219749	ZNF25	zinc finger protein 25	5.03017	4.42594	1.52017	0.60423	1.52017	up
2745	GLRX	glutaredoxin	9.20629	10.0177	-1.7549	-0.81139	1.7549	down
80119	PIF1	PIF1 5'-to-3' DNA helicase	8.77424	8.09404	1.60236	0.6802	1.60236	up
8218	CLTCL1	clathrin, heavy chain-like 1	6.24122	5.59719	1.56269	0.64403	1.56269	up
168330	PRSS3P1	protease, serine 3 pseudogene 1	6.21989	6.98204	-1.69602	-0.76215	1.69602	down
54823	SWT1	SWT1, RNA endoribonuclease homolog	6.09008	6.68398	-1.50932	-0.5939	1.50932	down
84881	RPUSD4	RNA pseudouridylate synthase domain containing 4	8.75106	7.23969	2.85081	1.51137	2.85081	up
245972	ATP6V0D2	ATPase, H+ transporting, lysosomal 38kDa, V0 subunit d2	5.89116	6.98584	-2.13566	-1.09468	2.13566	down
23193	GANAB	glucosidase, alpha; neutral AB	11.0489	9.93534	2.16377	1.11355	2.16377	up
10535	RNASEH2A	ribonuclease H2 subunit A	11.4429	10.66	1.72057	0.78289	1.72057	up
7086	TKT	transketolase	5.56604	6.24737	-1.60362	-0.68133	1.60362	down
55536	CDCA7L	cell division cycle associated 7-like	10.009	9.38846	1.53749	0.62058	1.53749	up
4306	NR3C2	nuclear receptor subfamily 3 group C member 2	4.23801	5.09502	-1.81128	-0.85701	1.81128	down
8975	USP13	ubiquitin specific peptidase 13 (isopeptidase T-3)	8.31195	7.66738	1.56327	0.64457	1.56327	up
3954	LETM1	leucine zipper-EF-hand containing transmembrane protein 1	8.93869	8.14747	1.73054	0.79122	1.73054	up
9493	KIF23	kinesin family member 23	10.4404	9.72497	1.64195	0.71541	1.64195	up
4883	NPR3	natriuretic peptide receptor 3	6.21347	5.31497	1.86413	0.8985	1.86413	up
23366	KIAA0895	KIAA0895	4.79335	5.41559	-1.53926	-0.62224	1.53926	down
10920	COPS8	COP9 signalosome subunit 8	10.8647	10.1511	1.6399	0.71361	1.6399	up
29890	RBM15B	RNA binding motif protein 15B	8.14825	7.53688	1.52771	0.61137	1.52771	up
8165	AKAP1	A-kinase anchoring protein 1	9.57886	8.90411	1.59632	0.67475	1.59632	up
94234	FOXQ1	forkhead box Q1	9.47403	10.1479	-1.5954	-0.67392	1.5954	down
7292	TNFSF4	tumor necrosis factor superfamily member 4	5.91186	6.78406	-1.83045	-0.8722	1.83045	down
55884	WSB2	WD repeat and SOCS box containing 2	9.1972	9.83591	-1.55694	-0.63871	1.55694	down
3399	ID3	inhibitor of DNA binding 3, dominant negative helix-loop-helix protein	9.44144	8.19861	2.36662	1.24283	2.36662	up
2043	EPHA4	EPH receptor A4	7.75206	8.35202	-1.51567	-0.59996	1.51567	down
5570	PKIB	protein kinase (cAMP-dependent, catalytic) inhibitor beta	5.47597	6.26234	-1.72473	-0.78637	1.72473	down
54682	MANSC1	MANSC domain containing 1	7.48598	8.1629	-1.59872	-0.67692	1.59872	down
4001	LMNB1	lamin B1	8.05266	7.41404	1.55684	0.63862	1.55684	up
1017	CDK2	cyclin-dependent kinase 2	9.74643	9.11751	1.54641	0.62892	1.54641	up
152573	SHISA3	shisa family member 3	7.22848	5.48815	3.34112	1.74033	3.34112	up
8228	PNPLA4	patatin like phospholipase domain containing 4	6.04534	6.72183	-1.59825	-0.67649	1.59825	down
7059	THBS3	thrombospondin 3	5.1433	5.74018	-1.51244	-0.59688	1.51244	down
170384	FUT11	fucosyltransferase 11 (alpha (1,3) fucosyltransferase)	7.25535	7.90811	-1.57217	-0.65276	1.57217	down
58986	TMEM8A	transmembrane protein 8A	8.16992	7.46049	1.63516	0.70943	1.63516	up
5999	RGS4	regulator of G-protein signaling 4	8.96034	9.56439	-1.51998	-0.60405	1.51998	down
6515	SLC2A3	solute carrier family 2 (facilitated glucose transporter), member 3	7.463	8.50182	-2.05455	-1.03882	2.05455	down
9695	EDEM1	ER degradation enhancer, mannosidase alpha-like 1	9.99665	10.8428	-1.79763	-0.8461	1.79763	down
3606	IL18	interleukin 18	8.51597	7.80141	1.64098	0.71456	1.64098	up
54014	BRWD1	bromodomain and WD repeat domain containing 1	6.73655	7.32907	-1.50788	-0.59252	1.50788	down
80306	MED28	mediator complex subunit 28	7.10824	7.7476	-1.55764	-0.63936	1.55764	down
10643	IGF2BP3	insulin like growth factor 2 mRNA binding protein 3	9.74424	10.455	-1.63662	-0.71072	1.63662	down
150094	SIK1	salt inducible kinase 1	9.20728	10.0955	-1.85089	-0.88822	1.85089	down
55432	YOD1	YOD1 deubiquitinase	9.56088	10.3451	-1.72214	-0.7842	1.72214	down
858	CAV2	caveolin 2	9.91346	10.7499	-1.78569	-0.83648	1.78569	down
144195	SLC2A14	solute carrier family 2 (facilitated glucose transporter), member 14	7.463	8.50182	-2.05455	-1.03882	2.05455	down
330	BIRC3	baculoviral IAP repeat containing 3	8.73064	9.33995	-1.52553	-0.60931	1.52553	down
4092	SMAD7	SMAD family member 7	7.06631	7.92398	-1.81211	-0.85767	1.81211	down
1876	E2F6	E2F transcription factor 6	7.26929	8.02624	-1.68991	-0.75695	1.68991	down
326624	RAB37	RAB37, member RAS oncogene family	4.48006	5.08944	-1.5256	-0.60938	1.5256	down
6876	TAGLN	transgelin	6.89125	6.28921	1.51786	0.60204	1.51786	up
93	ACVR2B	activin A receptor type IIB	7.36351	8.27835	-1.88536	-0.91484	1.88536	down
3140	MR1	major histocompatibility complex, class I-related	6.18036	6.89489	-1.64095	-0.71453	1.64095	down
808	CALM3	calmodulin 3 (phosphorylase kinase, delta)	9.77166	9.06941	1.62704	0.70225	1.62704	up
2679	GGT3P	gamma-glutamyltransferase 3 pseudogene	7.79392	8.58671	-1.73242	-0.79279	1.73242	down
57600	FNIP2	folliculin interacting protein 2	8.00358	8.65122	-1.5666	-0.64764	1.5666	down
51313	FAM198B	family with sequence similarity 198 member B	5.51104	6.43952	-1.90327	-0.92848	1.90327	down
3161	HMMR	hyaluronan-mediated motility receptor (RHAMM)	9.48652	8.87455	1.52834	0.61197	1.52834	up
3953	LEPR	leptin receptor	6.17232	5.493	1.60138	0.67932	1.60138	up
4331	MNAT1	MNAT CDK-activating kinase assembly factor 1	9.88414	9.29003	1.50954	0.59411	1.50954	up
91227	GGTLC2	gamma-glutamyltransferase light chain 2	7.79392	8.58671	-1.73242	-0.79279	1.73242	down
1031	CDKN2C	cyclin-dependent kinase inhibitor 2C (p18, inhibits CDK4)	10.0116	9.40721	1.52035	0.6044	1.52035	up
2288	FKBP4	FK506 binding protein 4	9.76143	9.17533	1.50118	0.5861	1.50118	up
9949	AMMECR1	Alport syndrome, mental retardation, midface hypoplasia and elliptocytosis chromosomal region gene 1	9.44022	10.1698	-1.65816	-0.72958	1.65816	down
51714	SELT	selenoprotein T	9.2299	9.87127	-1.55981	-0.64137	1.55981	down
22873	DZIP1	DAZ interacting zinc finger protein 1	4.78138	4.0951	1.60913	0.68628	1.60913	up
27010	TPK1	thiamin pyrophosphokinase 1	7.62364	6.64865	1.96563	0.97499	1.96563	up
113235	SLC46A1	solute carrier family 46 (folate transporter), member 1	6.46259	7.23312	-1.7059	-0.77053	1.7059	down
79762	C1orf115	chromosome 1 open reading frame 115	6.87905	5.67848	2.2983	1.20057	2.2983	up
1655	DDX5	DEAD (Asp-Glu-Ala-Asp) box helicase 5	8.28927	9.03101	-1.67219	-0.74174	1.67219	down
255919	CNEP1R1	CTD nuclear envelope phosphatase 1 regulatory subunit 1	7.4238	6.58806	1.78477	0.83574	1.78477	up
57476	GRAMD1B	GRAM domain containing 1B	5.71375	5.05398	1.57983	0.65977	1.57983	up
5306	PITPNA	phosphatidylinositol transfer protein alpha	9.63238	8.82254	1.75302	0.80984	1.75302	up
26355	FAM162A	family with sequence similarity 162 member A	10.6173	11.2036	-1.50139	-0.5863	1.50139	down
805	CALM2	calmodulin 2 (phosphorylase kinase, delta)	9.77166	9.06941	1.62704	0.70225	1.62704	up
80155	NAA15	N(alpha)-acetyltransferase 15, NatA auxiliary subunit	9.32743	8.39025	1.91478	0.93718	1.91478	up
84612	PARD6B	par-6 family cell polarity regulator beta	8.77803	9.41864	-1.55899	-0.64061	1.55899	down
10053	AP1M2	adaptor-related protein complex 1 mu 2 subunit	9.94998	9.3042	1.56458	0.64578	1.56458	up
7726	TRIM26	tripartite motif containing 26	8.96853	8.278	1.61388	0.69053	1.61388	up
51090	PLLP	plasmolipin	7.37226	8.03126	-1.57899	-0.659	1.57899	down
91300	R3HDM4	R3H domain containing 4	7.45494	8.04094	-1.50108	-0.586	1.50108	down
9947	MAGEC1	MAGE family member C1	8.25364	7.45702	1.73703	0.79662	1.73703	up
83594	NUDT12	nudix hydrolase 12	6.34093	5.72206	1.53567	0.61887	1.53567	up
114793	FMNL2	formin like 2	6.19572	6.84584	-1.5693	-0.65012	1.5693	down
10799	RPP40	ribonuclease P/MRP 40kDa subunit	10.2	9.56841	1.54928	0.6316	1.54928	up
54904	WHSC1L1	Wolf-Hirschhorn syndrome candidate 1-like 1	7.89529	7.23545	1.57991	0.65984	1.57991	up
665	BNIP3L	BCL2/adenovirus E1B 19kDa interacting protein 3-like	10.8131	11.5828	-1.70493	-0.76971	1.70493	down
80174	DBF4B	DBF4 zinc finger B	6.64783	5.99751	1.56952	0.65032	1.56952	up
4784	NFIX	nuclear factor I/X (CCAAT-binding transcription factor)	9.17345	9.79563	-1.5392	-0.62218	1.5392	down
57458	TMCC3	transmembrane and coiled-coil domain family 3	8.68435	9.32262	-1.55646	-0.63827	1.55646	down
5607	MAP2K5	mitogen-activated protein kinase kinase 5	6.95385	6.35455	1.51498	0.5993	1.51498	up
10082	GPC6	glypican 6	7.48548	6.89125	1.50967	0.59423	1.50967	up
160418	TMTC3	transmembrane and tetratricopeptide repeat containing 3	8.46461	7.76697	1.62185	0.69764	1.62185	up
205717	USF3	upstream transcription factor family member 3	8.00343	7.18265	1.76636	0.82078	1.76636	up
4017	LOXL2	lysyl oxidase like 2	8.05165	8.68032	-1.54614	-0.62867	1.54614	down
8445	DYRK2	dual specificity tyrosine-(Y)-phosphorylation regulated kinase 2	5.76122	6.58733	-1.7729	-0.82611	1.7729	down
8553	BHLHE40	basic helix-loop-helix family member e40	7.32875	8.00666	-1.59982	-0.67791	1.59982	down
84131	CEP78	centrosomal protein 78kDa	9.27349	8.67269	1.51656	0.6008	1.51656	up
272	AMPD3	adenosine monophosphate deaminase 3	6.2192	7.09856	-1.83956	-0.87936	1.83956	down
664	BNIP3	BCL2/adenovirus E1B 19kDa interacting protein 3	12.199	12.9007	-1.62635	-0.70164	1.62635	down
79660	PPP1R3B	protein phosphatase 1, regulatory subunit 3B	7.62926	8.32122	-1.61548	-0.69196	1.61548	down
223082	ZNRF2	zinc and ring finger 2, E3 ubiquitin protein ligase	7.19885	7.79669	-1.51345	-0.59784	1.51345	down
3678	ITGA5	integrin alpha 5	7.03367	7.7388	-1.63029	-0.70513	1.63029	down
221336	BEND6	BEN domain containing 6	6.92678	7.56378	-1.55509	-0.637	1.55509	down
57619	SHROOM3	shroom family member 3	8.02273	8.66266	-1.55825	-0.63993	1.55825	down
9099	USP2	ubiquitin specific peptidase 2	5.40159	4.59948	1.74365	0.80211	1.74365	up
91408	BTF3L4	basic transcription factor 3-like 4	9.54557	7.88307	3.16565	1.6625	3.16565	up
5525	PPP2R5A	protein phosphatase 2 regulatory subunit B', alpha	8.40538	7.69004	1.64187	0.71534	1.64187	up
3823	KLRC3	killer cell lectin-like receptor subfamily C, member 3	5.28361	6.0583	-1.71082	-0.77469	1.71082	down
4774	NFIA	nuclear factor I/A	5.822	5.23002	1.50731	0.59198	1.50731	up
9734	HDAC9	histone deacetylase 9	5.84398	6.67608	-1.78027	-0.8321	1.78027	down
5270	SERPINE2	serpin peptidase inhibitor, clade E (nexin, plasminogen activator inhibitor type 1), member 2	9.34265	9.96041	-1.53449	-0.61776	1.53449	down
7037	TFRC	transferrin receptor	12.8038	11.8684	1.91247	0.93544	1.91247	up
10024	TROAP	trophinin associated protein	8.97937	8.21468	1.699	0.76469	1.699	up
6347	CCL2	chemokine (C-C motif) ligand 2	5.38914	6.27304	-1.84536	-0.8839	1.84536	down
1469	CST1	cystatin SN	12.327	13.032	-1.63021	-0.70506	1.63021	down
221476	PI16	peptidase inhibitor 16	6.83356	7.45508	-1.5385	-0.62152	1.5385	down
6495	SIX1	SIX homeobox 1	7.86237	7.21146	1.57016	0.65091	1.57016	up
389541	LAMTOR4	late endosomal/lysosomal adaptor, MAPK and MTOR activator 4	10.4078	9.70883	1.62333	0.69896	1.62333	up
1028	CDKN1C	cyclin-dependent kinase inhibitor 1C (p57, Kip2)	8.54459	9.25821	-1.63991	-0.71362	1.63991	down
5825	ABCD3	ATP binding cassette subfamily D member 3	10.5883	9.61474	1.96364	0.97353	1.96364	up
1368	CPM	carboxypeptidase M	6.99917	7.58969	-1.50579	-0.59052	1.50579	down
55844	PPP2R2D	protein phosphatase 2 regulatory subunit B, delta	8.75156	8.0085	1.67372	0.74306	1.67372	up
6605	SMARCE1	SWI/SNF related, matrix associated, actin dependent regulator of chromatin, subfamily e, member 1	10.1129	9.49235	1.53747	0.62056	1.53747	up
51527	GSKIP	GSK3B interacting protein	10.1941	9.04308	2.22063	1.15097	2.22063	up
441425	ANKRD20A3	ankyrin repeat domain 20 family member A3	5.13222	4.43386	1.62266	0.69836	1.62266	up
10460	TACC3	transforming, acidic coiled-coil containing protein 3	9.70463	8.98806	1.64327	0.71657	1.64327	up
50862	RNF141	ring finger protein 141	6.8729	7.74286	-1.82761	-0.86996	1.82761	down
3589	IL11	interleukin 11	8.97036	7.69586	2.41915	1.2745	2.41915	up
3835	KIF22	kinesin family member 22	8.98674	8.37944	1.52341	0.6073	1.52341	up
221395	ADGRF5	adhesion G protein-coupled receptor F5	7.27075	8.44926	-2.26343	-1.17851	2.26343	down
6947	TCN1	transcobalamin I	6.70502	7.47747	-1.70817	-0.77245	1.70817	down
9945	GFPT2	glutamine-fructose-6-phosphate transaminase 2	8.43672	9.05998	-1.54035	-0.62326	1.54035	down
5274	SERPINI1	serpin peptidase inhibitor, clade I (neuroserpin), member 1	7.07561	6.25251	1.7692	0.8231	1.7692	up
2678	GGT1	gamma-glutamyltransferase 1	7.79392	8.58671	-1.73242	-0.79279	1.73242	down
63874	ABHD4	abhydrolase domain containing 4	7.4513	8.0909	-1.5579	-0.6396	1.5579	down
23119	HIC2	hypermethylated in cancer 2	6.59513	7.27968	-1.6072	-0.68455	1.6072	down
9444	QKI	QKI, KH domain containing, RNA binding	6.78406	5.6501	2.1946	1.13396	2.1946	up
11113	CIT	citron rho-interacting serine/threonine kinase	5.50853	4.69984	1.75162	0.80869	1.75162	up
92086	GGTLC1	gamma-glutamyltransferase light chain 1	7.79392	8.58671	-1.73242	-0.79279	1.73242	down
57089	ENTPD7	ectonucleoside triphosphate diphosphohydrolase 7	6.77091	7.90512	-2.19498	-1.13421	2.19498	down
91752	ZNF804A	zinc finger protein 804A	7.67915	6.96373	1.64196	0.71542	1.64196	up
5347	PLK1	polo-like kinase 1	7.88172	7.27875	1.51884	0.60297	1.51884	up
6711	SPTBN1	spectrin, beta, non-erythrocytic 1	7.95249	7.28268	1.59086	0.66981	1.59086	up
26286	ARFGAP3	ADP ribosylation factor GTPase activating protein 3	7.92575	7.28234	1.56202	0.64341	1.56202	up
79697	C14orf169	chromosome 14 open reading frame 169	9.69097	9.05851	1.55021	0.63246	1.55021	up
2624	GATA2	GATA binding protein 2	8.30129	7.60089	1.62496	0.7004	1.62496	up
79041	TMEM38A	transmembrane protein 38A	8.65934	9.48167	-1.76826	-0.82233	1.76826	down
102724197	LOC102724197	inactive gamma-glutamyltranspeptidase 2-like	7.79392	8.58671	-1.73242	-0.79279	1.73242	down
653590	GGTLC5P	gamma-glutamyltransferase light chain 5 pseudogene	7.79392	8.58671	-1.73242	-0.79279	1.73242	down
283316	CD163L1	CD163 molecule like 1	7.95902	6.88066	2.11163	1.07836	2.11163	up
92092	ZC3HAV1L	zinc finger CCCH-type, antiviral 1-like	9.29902	10.0706	-1.70708	-0.77153	1.70708	down
819	CAMLG	calcium modulating ligand	10.3191	9.56342	1.68847	0.75572	1.68847	up
2769	GNA15	guanine nucleotide binding protein (G protein), alpha 15 (Gq class)	8.14867	7.3217	1.77396	0.82697	1.77396	up
115548	FCHO2	FCH domain only 2	5.96791	6.59512	-1.54458	-0.62721	1.54458	down
5868	RAB5A	RAB5A, member RAS oncogene family	9.46126	8.74064	1.64789	0.72062	1.64789	up
57763	ANKRA2	ankyrin repeat, family A (RFXANK-like), 2	5.67921	6.7095	-2.04243	-1.03029	2.04243	down
146712	B3GNTL1	UDP-GlcNAc:betaGal beta-1,3-N-acetylglucosaminyltransferase-like 1	8.31247	7.71021	1.51809	0.60226	1.51809	up
57007	ACKR3	atypical chemokine receptor 3	4.74589	5.59429	-1.8005	-0.8484	1.8005	down
114928	GPRASP2	G protein-coupled receptor associated sorting protein 2	8.31136	7.71032	1.51681	0.60104	1.51681	up
60312	AFAP1	actin filament associated protein 1	10.4406	9.79344	1.56613	0.6472	1.56613	up
5327	PLAT	plasminogen activator, tissue	11.2751	11.9169	-1.56031	-0.64183	1.56031	down
7447	VSNL1	visinin like 1	7.73468	8.64803	-1.88341	-0.91335	1.88341	down
1803	DPP4	dipeptidyl-peptidase 4	6.35745	6.98977	-1.55006	-0.63232	1.55006	down
387755	INSC	inscuteable homolog (Drosophila)	5.04737	5.86313	-1.76023	-0.81576	1.76023	down
353323	KRTAP12-2	keratin associated protein 12-2	6.84617	7.45257	-1.52246	-0.6064	1.52246	down
3397	ID1	inhibitor of DNA binding 1, dominant negative helix-loop-helix protein	11.9648	10.8758	2.12734	1.08905	2.12734	up
51691	LSM8	LSM8 homolog, U6 small nuclear RNA associated	10.5789	9.98777	1.50642	0.59112	1.50642	up
6916	TBXAS1	thromboxane A synthase 1	7.20767	7.79695	-1.5045	-0.58928	1.5045	down
113201	CASC4	cancer susceptibility candidate 4	5.49104	6.07725	-1.5013	-0.58621	1.5013	down
54852	PAQR5	progestin and adipoQ receptor family member V	6.91906	6.15023	1.70389	0.76883	1.70389	up
794	CALB2	calbindin 2	9.59937	10.6047	-2.00746	-1.00537	2.00746	down
5601	MAPK9	mitogen-activated protein kinase 9	5.9545	5.07646	1.83788	0.87804	1.83788	up
4015	LOX	lysyl oxidase	8.06399	9.23045	-2.2446	-1.16646	2.2446	down
6503	SLA	Src-like-adaptor	5.74303	5.14524	1.5134	0.59779	1.5134	up
55269	PSPC1	paraspeckle component 1	6.89945	6.10752	1.73139	0.79193	1.73139	up
8572	PDLIM4	PDZ and LIM domain 4	6.71013	7.3564	-1.56512	-0.64627	1.56512	down
196743	PAOX	polyamine oxidase (exo-N4-amino)	8.41703	7.81652	1.51625	0.60051	1.51625	up
5175	PECAM1	platelet/endothelial cell adhesion molecule 1	5.12269	5.96165	-1.78876	-0.83896	1.78876	down
6447	SCG5	secretogranin V	6.8899	8.35896	-2.76841	-1.46906	2.76841	down
3925	STMN1	stathmin 1	11.1635	10.5218	1.56014	0.64168	1.56014	up
538	ATP7A	ATPase, Cu++ transporting, alpha polypeptide	7.45384	8.07482	-1.53792	-0.62098	1.53792	down
8863	PER3	period circadian clock 3	6.55851	5.90366	1.57445	0.65485	1.57445	up
404672	GTF2H5	general transcription factor IIH subunit 5	6.01752	6.67152	-1.57352	-0.654	1.57352	down
60559	SPCS3	signal peptidase complex subunit 3	9.45488	10.8108	-2.55953	-1.35588	2.55953	down
54541	DDIT4	DNA damage inducible transcript 4	10.9521	11.5819	-1.54736	-0.62981	1.54736	down
51655	RASD1	RAS, dexamethasone-induced 1	8.67138	7.46521	2.30724	1.20617	2.30724	up
200424	TET3	tet methylcytosine dioxygenase 3	7.24552	8.25374	-2.01143	-1.00822	2.01143	down
518	ATP5G3	ATP synthase, H+ transporting, mitochondrial Fo complex subunit C3 (subunit 9)	7.87147	8.51838	-1.56581	-0.64691	1.56581	down
901	CCNG2	cyclin G2	8.69207	9.28616	-1.50952	-0.59409	1.50952	down
30061	SLC40A1	solute carrier family 40 (iron-regulated transporter), member 1	6.22582	6.92231	-1.62056	-0.69649	1.62056	down
10645	CAMKK2	calcium/calmodulin-dependent protein kinase kinase 2, beta	5.32929	5.94958	-1.53718	-0.62029	1.53718	down
25978	CHMP2B	charged multivesicular body protein 2B	9.75207	8.96766	1.72239	0.78441	1.72239	up
134285	TMEM171	transmembrane protein 171	9.07044	9.68114	-1.527	-0.6107	1.527	down
114932	MRFAP1L1	Morf4 family associated protein 1-like 1	10.1921	9.45611	1.66551	0.73596	1.66551	up
93550	ZFAND4	zinc finger, AN1-type domain 4	6.07572	5.3986	1.59894	0.67712	1.59894	up
81606	LBH	limb bud and heart development	7.32765	7.98238	-1.57432	-0.65473	1.57432	down
64856	VWA1	von Willebrand factor A domain containing 1	6.37506	6.96624	-1.50648	-0.59118	1.50648	down
687	KLF9	Kruppel-like factor 9	7.99489	8.65741	-1.58285	-0.66252	1.58285	down
6563	SLC14A1	solute carrier family 14 (urea transporter), member 1 (Kidd blood group)	4.64737	5.56157	-1.88452	-0.9142	1.88452	down
23176	SEPT8	septin 8	8.44172	7.83103	1.52699	0.61069	1.52699	up
9886	RHOBTB1	Rho-related BTB domain containing 1	6.23439	6.84301	-1.5248	-0.60862	1.5248	down
170712	COX7B2	cytochrome c oxidase subunit VIIb2	7.63086	6.79709	1.78234	0.83377	1.78234	up
92345	NAF1	nuclear assembly factor 1 ribonucleoprotein	7.2551	6.62122	1.55173	0.63388	1.55173	up
9553	MRPL33	mitochondrial ribosomal protein L33	10.6858	9.4802	2.30635	1.20561	2.30635	up
3290	HSD11B1	hydroxysteroid (11-beta) dehydrogenase 1	5.82063	6.75027	-1.9048	-0.92964	1.9048	down
1545	CYP1B1	cytochrome P450, family 1, subfamily B, polypeptide 1	10.302	10.9824	-1.6026	-0.68041	1.6026	down
57827	C6orf47	chromosome 6 open reading frame 47	8.14188	7.04602	2.1374	1.09586	2.1374	up
84316	NAA38	N(alpha)-acetyltransferase 38, NatC auxiliary subunit	10.5789	9.98777	1.50642	0.59112	1.50642	up
9928	KIF14	kinesin family member 14	9.78389	9.14715	1.55481	0.63674	1.55481	up
1950	EGF	epidermal growth factor	4.95369	4.25614	1.62175	0.69755	1.62175	up
353332	KRTAP12-1	keratin associated protein 12-1	6.84617	7.45257	-1.52246	-0.6064	1.52246	down
339745	SPOPL	speckle type POZ protein like	8.25292	7.51929	1.66282	0.73363	1.66282	up
5701	PSMC2	proteasome 26S subunit, ATPase 2	7.99613	8.60014	-1.51994	-0.60401	1.51994	down
9802	DAZAP2	DAZ associated protein 2	6.31332	6.94442	-1.54875	-0.6311	1.54875	down
8671	SLC4A4	solute carrier family 4 (sodium bicarbonate cotransporter), member 4	6.72828	6.11755	1.52703	0.61073	1.52703	up
441094	NR2F1-AS1	NR2F1 antisense RNA 1	8.47623	7.79649	1.60185	0.67974	1.60185	up
150737	TTC30B	tetratricopeptide repeat domain 30B	4.29863	5.02925	-1.65935	-0.73062	1.65935	down
148213	ZNF681	zinc finger protein 681	6.99256	6.34688	1.56448	0.64568	1.56448	up
3038	HAS3	hyaluronan synthase 3	6.36569	7.36799	-2.00319	-1.0023	2.00319	down
6304	SATB1	SATB homeobox 1	7.95249	8.6942	-1.67216	-0.74171	1.67216	down
221092	HNRNPUL2	heterogeneous nuclear ribonucleoprotein U-like 2	9.78559	8.75555	2.04208	1.03004	2.04208	up
8325	FZD8	frizzled class receptor 8	9.04833	9.7317	-1.60589	-0.68337	1.60589	down
9966	TNFSF15	tumor necrosis factor superfamily member 15	7.55239	8.96738	-2.66658	-1.41499	2.66658	down
965	CD58	CD58 molecule	8.76123	9.46549	-1.62931	-0.70426	1.62931	down
3685	ITGAV	integrin alpha V	7.67076	8.26435	-1.509	-0.59359	1.509	down
7097	TLR2	toll-like receptor 2	7.42323	8.04952	-1.54359	-0.62629	1.54359	down
653820	FAM72B	family with sequence similarity 72 member B	9.73131	9.14213	1.50439	0.58918	1.50439	up
154754	PRSS3P2	protease, serine 3 pseudogene 2	6.21989	6.98204	-1.69602	-0.76215	1.69602	down
80224	NUBPL	nucleotide binding protein-like	6.87905	6.07052	1.75143	0.80853	1.75143	up
84171	LOXL4	lysyl oxidase like 4	9.71377	10.4085	-1.61864	-0.69478	1.61864	down
5742	PTGS1	prostaglandin-endoperoxide synthase 1 (prostaglandin G/H synthase and cyclooxygenase)	5.83515	5.07148	1.6978	0.76367	1.6978	up
1910	EDNRB	endothelin receptor type B	8.44587	7.27339	2.25399	1.17248	2.25399	up
7294	TXK	TXK tyrosine kinase	6.77892	7.4009	-1.53899	-0.62198	1.53899	down
254251	LCORL	ligand dependent nuclear receptor corepressor like	7.66625	7.04554	1.53763	0.62071	1.53763	up
63935	PCIF1	PDX1 C-terminal inhibiting factor 1	8.05266	7.41404	1.55684	0.63862	1.55684	up
9052	GPRC5A	G protein-coupled receptor, class C, group 5, member A	8.20808	8.90778	-1.62417	-0.6997	1.62417	down
10081	PDCD7	programmed cell death 7	8.14298	7.27109	1.83006	0.87189	1.83006	up
29080	CCDC59	coiled-coil domain containing 59	6.91535	6.09183	1.76972	0.82352	1.76972	up
375061	FAM89A	family with sequence similarity 89 member A	7.81567	7.07377	1.67238	0.7419	1.67238	up
11108	PRDM4	PR domain containing 4	9.51394	8.91467	1.51495	0.59927	1.51495	up
56951	C5orf15	chromosome 5 open reading frame 15	11.3827	10.6745	1.6338	0.70823	1.6338	up
444	ASPH	aspartate beta-hydroxylase	8.63321	7.73723	1.86087	0.89598	1.86087	up
7099	TLR4	toll-like receptor 4	9.54647	10.4435	-1.8622	-0.89701	1.8622	down
5646	PRSS3	protease, serine 3	7.62468	8.29676	-1.59337	-0.67208	1.59337	down
153339	TMEM167A	transmembrane protein 167A	10.065	10.7713	-1.63167	-0.70635	1.63167	down
5465	PPARA	peroxisome proliferator-activated receptor alpha	7.90172	8.52573	-1.54115	-0.62401	1.54115	down
9236	CCPG1	cell cycle progression 1	6.49515	7.11589	-1.53766	-0.62074	1.53766	down
6319	SCD	stearoyl-CoA desaturase (delta-9-desaturase)	9.92787	10.7044	-1.71301	-0.77653	1.71301	down
4856	NOV	nephroblastoma overexpressed	9.73143	10.5116	-1.71737	-0.7802	1.71737	down
1289	COL5A1	collagen, type V, alpha 1	7.86855	8.6464	-1.71457	-0.77785	1.71457	down
22890	ZBTB1	zinc finger and BTB domain containing 1	5.78131	6.52654	-1.67624	-0.74523	1.67624	down
80853	KDM7A	lysine (K)-specific demethylase 7A	6.64436	7.29433	-1.56914	-0.64997	1.56914	down
11166	SOX21	SRY-box 21	5.00677	4.20307	1.74557	0.8037	1.74557	up
1509	CTSD	cathepsin D	11.6165	12.2314	-1.53141	-0.61486	1.53141	down
7056	THBD	thrombomodulin	9.3602	10.1022	-1.67255	-0.74205	1.67255	down
3977	LIFR	leukemia inhibitory factor receptor alpha	8.33487	7.58953	1.67637	0.74534	1.67637	up
55664	CDC37L1	cell division cycle 37-like 1	6.86533	7.51748	-1.57151	-0.65215	1.57151	down
5048	PAFAH1B1	platelet activating factor acetylhydrolase 1b regulatory subunit 1	5.86808	6.50998	-1.56038	-0.6419	1.56038	down
284161	GDPD1	glycerophosphodiester phosphodiesterase domain containing 1	5.88815	6.55297	-1.58537	-0.66482	1.58537	down
79602	ADIPOR2	adiponectin receptor 2	9.93122	9.17418	1.69002	0.75704	1.69002	up
8660	IRS2	insulin receptor substrate 2	8.94053	9.58494	-1.5631	-0.64441	1.5631	down
55764	IFT122	intraflagellar transport 122	7.11203	6.26382	1.80027	0.84821	1.80027	up
221393	ADGRF4	adhesion G protein-coupled receptor F4	5.23881	5.8811	-1.5608	-0.64229	1.5608	down
5627	PROS1	protein S (alpha)	8.06029	8.66446	-1.5201	-0.60417	1.5201	down
58528	RRAGD	Ras-related GTP binding D	9.15539	10.0419	-1.84865	-0.88647	1.84865	down
51129	ANGPTL4	angiopoietin like 4	7.31618	7.9731	-1.57671	-0.65692	1.57671	down
1959	EGR2	early growth response 2	4.44369	5.08896	-1.56403	-0.64527	1.56403	down
6781	STC1	stanniocalcin 1	9.36747	10.0332	-1.58633	-0.66569	1.58633	down
3053	SERPIND1	serpin peptidase inhibitor, clade D (heparin cofactor), member 1	5.64082	6.35279	-1.63804	-0.71197	1.63804	down
84210	ANKRD20A1	ankyrin repeat domain 20 family member A1	5.13222	4.43386	1.62266	0.69836	1.62266	up
3556	IL1RAP	interleukin 1 receptor accessory protein	7.07296	8.28475	-2.31625	-1.21179	2.31625	down
1459	CSNK2A2	casein kinase 2, alpha prime polypeptide	7.13531	6.53751	1.51341	0.5978	1.51341	up
152006	RNF38	ring finger protein 38	9.0109	9.60326	-1.50771	-0.59236	1.50771	down
329	BIRC2	baculoviral IAP repeat containing 2	10.2491	9.52178	1.65558	0.72734	1.65558	up
55916	NXT2	nuclear transport factor 2-like export factor 2	7.86546	8.46056	-1.51058	-0.5951	1.51058	down
2273	FHL1	four and a half LIM domains 1	7.83555	7.1524	1.60564	0.68315	1.60564	up
995	CDC25C	cell division cycle 25C	9.39522	8.72748	1.58858	0.66774	1.58858	up
2651	GCNT2	glucosaminyl (N-acetyl) transferase 2, I-branching enzyme (I blood group)	11.0331	10.3887	1.56312	0.64443	1.56312	up
735301	SNHG9	small nucleolar RNA host gene 9	7.16079	6.48587	1.59651	0.67492	1.59651	up
8714	ABCC3	ATP binding cassette subfamily C member 3	6.80002	7.74901	-1.93052	-0.94899	1.93052	down
81493	SYNC	syncoilin, intermediate filament protein	6.15038	5.49331	1.57688	0.65707	1.57688	up
23043	TNIK	TRAF2 and NCK interacting kinase	6.21711	6.89971	-1.60503	-0.6826	1.60503	down
5890	RAD51B	RAD51 paralog B	5.95889	5.36317	1.51123	0.59572	1.51123	up
9270	ITGB1BP1	integrin beta 1 binding protein 1	7.38755	6.6476	1.67012	0.73995	1.67012	up
5208	PFKFB2	6-phosphofructo-2-kinase/fructose-2,6-biphosphatase 2	7.80646	8.53702	-1.65928	-0.73056	1.65928	down
1241	LTB4R	leukotriene B4 receptor	5.06071	5.68125	-1.53745	-0.62054	1.53745	down
23541	SEC14L2	SEC14-like lipid binding 2	5.95247	6.57713	-1.54185	-0.62466	1.54185	down
57669	EPB41L5	erythrocyte membrane protein band 4.1 like 5	7.69165	6.91794	1.70966	0.77371	1.70966	up
5099	PCDH7	protocadherin 7	6.49408	5.80381	1.61359	0.69027	1.61359	up
80312	TET1	tet methylcytosine dioxygenase 1	5.68105	6.8603	-2.26459	-1.17925	2.26459	down
204	AK2	adenylate kinase 2	9.60509	10.2045	-1.51507	-0.59938	1.51507	down
113452	TMEM54	transmembrane protein 54	8.84483	8.23134	1.52996	0.61349	1.52996	up
64794	DDX31	DEAD (Asp-Glu-Ala-Asp) box polypeptide 31	6.94493	6.30754	1.55551	0.63739	1.55551	up
8436	SDPR	serum deprivation response	9.26555	8.1826	2.11836	1.08295	2.11836	up
728833	FAM72D	family with sequence similarity 72 member D	9.73131	9.14213	1.50439	0.58918	1.50439	up
26959	HBP1	HMG-box transcription factor 1	8.19823	8.79995	-1.51752	-0.60172	1.51752	down
1389	CREBL2	cAMP responsive element binding protein-like 2	10.2541	9.57025	1.60641	0.68384	1.60641	up
5519	PPP2R1B	protein phosphatase 2 regulatory subunit A, beta	8.64583	9.32058	-1.59632	-0.67475	1.59632	down
6482	ST3GAL1	ST3 beta-galactoside alpha-2,3-sialyltransferase 1	7.89029	8.51083	-1.53745	-0.62054	1.53745	down
64766	S100PBP	S100P binding protein	9.1623	9.76599	-1.5196	-0.60369	1.5196	down
3084	NRG1	neuregulin 1	10.9165	11.521	-1.52045	-0.6045	1.52045	down
8091	HMGA2	high mobility group AT-hook 2	9.83401	11.2492	-2.66702	-1.41523	2.66702	down
4126	MANBA	mannosidase, beta A, lysosomal	7.41537	8.0859	-1.59166	-0.67053	1.59166	down
5069	PAPPA	pregnancy-associated plasma protein A, pappalysin 1	6.7755	7.4673	-1.6153	-0.6918	1.6153	down
387921	NHLRC3	NHL repeat containing 3	7.67035	8.66429	-1.99162	-0.99394	1.99162	down
51105	PHF20L1	PHD finger protein 20-like 1	6.97119	7.6033	-1.54983	-0.63211	1.54983	down
9048	ARTN	artemin	7.08995	6.48874	1.51699	0.60121	1.51699	up
131583	FAM43A	family with sequence similarity 43 member A	8.11478	8.88247	-1.70254	-0.76769	1.70254	down
80833	APOL3	apolipoprotein L, 3	5.93563	6.52615	-1.50579	-0.59052	1.50579	down
54492	NEURL1B	neuralized E3 ubiquitin protein ligase 1B	8.52163	6.94375	2.98531	1.57788	2.98531	up
105372733	LOC105372733	uncharacterized LOC105372733	6.83556	5.90797	1.9021	0.92759	1.9021	up
728441	GGT2	gamma-glutamyltransferase 2	7.79392	8.58671	-1.73242	-0.79279	1.73242	down
253512	SLC25A30	solute carrier family 25, member 30	4.94231	5.63593	-1.61734	-0.69362	1.61734	down
730755	KRTAP2-3	keratin associated protein 2-3	9.61338	8.53394	2.11322	1.07944	2.11322	up
7357	UGCG	UDP-glucose ceramide glucosyltransferase	10.5149	11.3017	-1.72522	-0.78678	1.72522	down
26020	LRP10	LDL receptor related protein 10	5.92953	6.6522	-1.65023	-0.72267	1.65023	down
2012	EMP1	epithelial membrane protein 1	6.60651	7.51985	-1.8834	-0.91334	1.8834	down
4850	CNOT4	CCR4-NOT transcription complex subunit 4	4.48408	5.28619	-1.74365	-0.80211	1.74365	down
153768	PRELID2	PRELI domain containing 2	6.9259	7.67343	-1.67892	-0.74753	1.67892	down
91694	LONRF1	LON peptidase N-terminal domain and ring finger 1	6.09867	5.27224	1.77329	0.82643	1.77329	up
554282	FAM72C	family with sequence similarity 72 member C	9.73131	9.14213	1.50439	0.58918	1.50439	up
6404	SELPLG	selectin P ligand	5.7133	6.35743	-1.5628	-0.64413	1.5628	down
6809	STX3	syntaxin 3	10.0072	10.6165	-1.52554	-0.60932	1.52554	down
25898	RCHY1	ring finger and CHY zinc finger domain containing 1, E3 ubiquitin protein ligase	9.75105	8.79995	1.93335	0.9511	1.93335	up
1755	DMBT1	deleted in malignant brain tumors 1	8.40218	7.7104	1.61528	0.69178	1.61528	up
53405	CLIC5	chloride intracellular channel 5	5.205	4.50204	1.62784	0.70296	1.62784	up
50619	DEF6	DEF6, guanine nucleotide exchange factor	7.30185	6.70655	1.51079	0.5953	1.51079	up
1954	MEGF8	multiple EGF-like-domains 8	4.54969	5.23239	-1.60514	-0.6827	1.60514	down
56648	EIF5A2	eukaryotic translation initiation factor 5A2	6.73783	5.89412	1.79466	0.84371	1.79466	up
5311	PKD2	polycystic kidney disease 2 (autosomal dominant)	10.1425	9.5017	1.55917	0.64078	1.55917	up
9586	CREB5	cAMP responsive element binding protein 5	4.37148	5.13544	-1.69815	-0.76396	1.69815	down
4940	OAS3	2'-5'-oligoadenylate synthetase 3	5.99967	6.6518	-1.57149	-0.65213	1.57149	down
51495	HACD3	3-hydroxyacyl-CoA dehydratase 3	10.9574	10.2604	1.6212	0.69706	1.6212	up
5824	PEX19	peroxisomal biogenesis factor 19	9.31994	8.20488	2.16604	1.11506	2.16604	up
4939	OAS2	2'-5'-oligoadenylate synthetase 2	5.99967	6.6518	-1.57149	-0.65213	1.57149	down
4925	NUCB2	nucleobindin 2	7.80223	7.05209	1.68196	0.75014	1.68196	up
3096	HIVEP1	human immunodeficiency virus type I enhancer binding protein 1	6.45698	7.22304	-1.70062	-0.76606	1.70062	down
54800	KLHL24	kelch like family member 24	6.55775	7.83735	-2.42772	-1.2796	2.42772	down
5906	RAP1A	RAP1A, member of RAS oncogene family	9.7147	10.5361	-1.76708	-0.82137	1.76708	down
5563	PRKAA2	protein kinase, AMP-activated, alpha 2 catalytic subunit	8.04874	7.22487	1.77015	0.82387	1.77015	up
9957	HS3ST1	heparan sulfate-glucosamine 3-sulfotransferase 1	9.7117	10.3784	-1.58743	-0.66669	1.58743	down
8738	CRADD	CASP2 and RIPK1 domain containing adaptor with death domain	9.47407	8.68573	1.72709	0.78834	1.72709	up
154661	RUNDC3B	RUN domain containing 3B	6.41169	5.77708	1.55252	0.63461	1.55252	up
3915	LAMC1	laminin subunit gamma 1	9.46065	10.122	-1.58159	-0.66138	1.58159	down
5218	CDK14	cyclin-dependent kinase 14	7.9583	7.31928	1.55727	0.63902	1.55727	up
54478	FAM64A	family with sequence similarity 64 member A	10.8838	9.99963	1.84569	0.88416	1.84569	up
332	BIRC5	baculoviral IAP repeat containing 5	11.0909	10.2033	1.85011	0.88761	1.85011	up
650	BMP2	bone morphogenetic protein 2	5.59556	6.34498	-1.68112	-0.74942	1.68112	down
55847	CISD1	CDGSH iron sulfur domain 1	6.51732	7.19732	-1.60214	-0.68	1.60214	down
79589	RNF128	ring finger protein 128, E3 ubiquitin protein ligase	8.49448	9.67792	-2.27118	-1.18344	2.27118	down
85453	TSPYL5	TSPY-like 5	8.63617	7.97132	1.5854	0.66485	1.5854	up
259232	NALCN	sodium leak channel, non selective	5.14723	4.26548	1.84261	0.88175	1.84261	up
102724428	LOC102724428	serine/threonine-protein kinase SIK1	9.20728	10.0955	-1.85089	-0.88822	1.85089	down
206358	SLC36A1	solute carrier family 36 (proton/amino acid symporter), member 1	8.59091	9.26164	-1.59188	-0.67073	1.59188	down
6382	SDC1	syndecan 1	9.31617	8.54655	1.70482	0.76962	1.70482	up
1052	CEBPD	CCAAT/enhancer binding protein (C/EBP), delta	7.72223	8.32188	-1.51535	-0.59965	1.51535	down
345651	ACTBL2	actin, beta-like 2	3.78929	5.10098	-2.48232	-1.31169	2.48232	down
55667	DENND4C	DENN/MADD domain containing 4C	7.54663	8.15574	-1.52532	-0.60911	1.52532	down
340719	NANOS1	nanos homolog 1 (Drosophila)	9.1961	10.0595	-1.81932	-0.8634	1.81932	down
2260	FGFR1	fibroblast growth factor receptor 1	9.03364	8.42822	1.52142	0.60542	1.52142	up
5210	PFKFB4	6-phosphofructo-2-kinase/fructose-2,6-biphosphatase 4	7.76364	8.68013	-1.88752	-0.91649	1.88752	down
84885	ZDHHC12	zinc finger, DHHC-type containing 12	8.74325	8.13327	1.52624	0.60998	1.52624	up
10124	ARL4A	ADP ribosylation factor like GTPase 4A	7.84955	6.69221	2.23046	1.15734	2.23046	up
54916	TMEM260	transmembrane protein 260	5.41899	6.01733	-1.51397	-0.59834	1.51397	down
1915	EEF1A1	eukaryotic translation elongation factor 1 alpha 1	8.22304	9.09921	-1.8355	-0.87617	1.8355	down
11342	RNF13	ring finger protein 13	8.35626	9.08003	-1.65149	-0.72377	1.65149	down
11099	PTPN21	protein tyrosine phosphatase, non-receptor type 21	7.81768	8.45096	-1.55109	-0.63328	1.55109	down
54819	ZCCHC10	zinc finger, CCHC domain containing 10	6.33802	7.04612	-1.63365	-0.7081	1.63365	down
5324	PLAG1	pleiomorphic adenoma gene 1	7.11082	7.70298	-1.5075	-0.59216	1.5075	down
56925	LXN	latexin	7.09628	5.99117	2.15115	1.10511	2.15115	up
889	KRIT1	KRIT1, ankyrin repeat containing	5.95935	6.5847	-1.54259	-0.62535	1.54259	down
64762	GAREM1	GRB2 associated regulator of MAPK1 subtype 1	6.10308	6.79252	-1.61266	-0.68944	1.61266	down
6041	RNASEL	ribonuclease L (2',5'-oligoisoadenylate synthetase-dependent)	5.49216	6.27059	-1.71526	-0.77843	1.71526	down
6672	SP100	SP100 nuclear antigen	6.17757	6.7983	-1.53765	-0.62073	1.53765	down
56477	CCL28	chemokine (C-C motif) ligand 28	4.87978	5.49678	-1.53368	-0.617	1.53368	down
7107	GPR137B	G protein-coupled receptor 137B	7.55334	8.28057	-1.65546	-0.72723	1.65546	down
55662	HIF1AN	hypoxia inducible factor 1, alpha subunit inhibitor	7.62034	8.47092	-1.80323	-0.85058	1.80323	down
9633	MTL5	metallothionein-like 5, testis-specific (tesmin)	6.55216	5.66637	1.84778	0.88579	1.84778	up
653712	LOC653712	intraflagellar transport 122 homolog (Chlamydomonas) pseudogene	7.11203	6.26382	1.80027	0.84821	1.80027	up
1278	COL1A2	collagen, type I, alpha 2	5.76133	6.44488	-1.60609	-0.68355	1.60609	down
7869	SEMA3B	sema domain, immunoglobulin domain (Ig), short basic domain, secreted, (semaphorin) 3B	7.60885	8.22842	-1.53642	-0.61957	1.53642	down
2983	GUCY1B3	guanylate cyclase 1, soluble, beta 3	6.4441	5.53287	1.88065	0.91123	1.88065	up
23270	TSPYL4	TSPY-like 4	8.69902	8.10765	1.50668	0.59137	1.50668	up
10221	TRIB1	tribbles pseudokinase 1	9.04391	9.63122	-1.50244	-0.58731	1.50244	down
122830	NAA30	N(alpha)-acetyltransferase 30, NatC catalytic subunit	8.93475	9.61664	-1.60424	-0.68189	1.60424	down
55740	ENAH	enabled homolog (Drosophila)	10.1493	9.55818	1.50639	0.5911	1.50639	up
440145	MZT1	mitotic spindle organizing protein 1	7.68973	5.67271	4.04747	2.01702	4.04747	up
161582	DYX1C1	dyslexia susceptibility 1 candidate 1	5.66362	6.29726	-1.55147	-0.63364	1.55147	down
222235	FBXL13	F-box and leucine-rich repeat protein 13	5.62636	6.33833	-1.63804	-0.71197	1.63804	down
50859	SPOCK3	sparc/osteonectin, cwcv and kazal-like domains proteoglycan (testican) 3	5.61002	6.32516	-1.64164	-0.71514	1.64164	down
55534	MAML3	mastermind like transcriptional coactivator 3	7.027	8.08231	-2.07816	-1.05531	2.07816	down
205428	C3orf58	chromosome 3 open reading frame 58	5.76369	6.64154	-1.83763	-0.87785	1.83763	down
200895	DHFRL1	dihydrofolate reductase like 1	4.45992	5.1139	-1.5735	-0.65398	1.5735	down
118812	MORN4	MORN repeat containing 4	6.24896	6.8388	-1.50508	-0.58984	1.50508	down
84952	CGNL1	cingulin-like 1	6.15711	6.9026	-1.67654	-0.74549	1.67654	down
8908	GYG2	glycogenin 2	6.18026	5.21817	1.94813	0.96209	1.94813	up
27339	PRPF19	pre-mRNA processing factor 19	10.9857	10.3943	1.50673	0.59142	1.50673	up
